# Supplementary material
Source: Research Square preprint supplement (doi:10.21203/rs.3.rs-8864680/v1)
Supplement: Supplementary file 1 [file 1e429956eeb0cbe345ce24d5.docx]

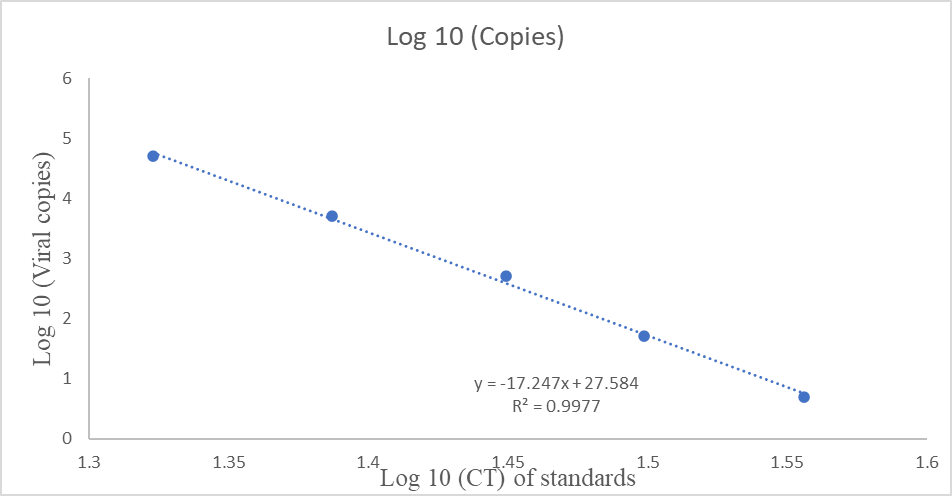


**Figure 3**: Linear graph of HDV standards and equation for the calculation of the viral copies of the 2 positive HDV samples.

Note: Log 10, Logarithm of 10; CT- cycle threshold; y, viral copies in log 10 for HDV standards; x- CT values of HDV standards; R, linear correlation coefficient
