# Supplementary material
Source: Research Square preprint supplement (doi:10.21203/rs.3.rs-8864680/v1)
Supplement: Supplementary file 2 [file a241bb4bacca212998a0b99e.docx]

**Questionnaire**

**Title of Study: Molecular detection of Hepatitis D virus infection and associated factors among hepatitis B virus patients from selected hospitals in Accra**

**Participant ID No...…………………………………..**

**Date of sample collection ...………………………….**

**Name of data collector...……………………………..**

**Facility Name: ……………………………………….**

**Type of sample……………………………………….**

**Socio-demographic data collection**

1. **Name of participant**: ________________________________________
2. **Sex of patient**: Male Female
3. **Date of Visit to the hospital: _________________________________**
4. **Date of Birth………………………………… Age: ………………….**
5. **Marital status**

Married Single divorced widowed

1. **Level of Education**

Tertiary Secondary Basic No formal education

1. **Economic status**

Employed Unemployed Retired from work

1. If employed or retired from work, please provide

**Current Occupation**………………………… or **Previous occupation**………………………………..

**Questionnaire**

**Title of Study: Molecular detection of Hepatitis D virus infection and associated factors among hepatitis B virus patients from selected hospitals in Accra**

1. **Place of residency (District or Region)**
2. **Region_______________________ b. District__________________________**

1. What are the ways by which one could be infected with the hepatitis B virus? (Please tick the appropriate box)
2. **Healthcare Work Related**

Contact with infected persons or materials (infected through patient care, sharps, syringes)

Splashes of infected fluid on health worker (blood)

1. **Lifestyle**

Injectable drugs through sharing needles

Multiple sexual partners

Tattooing

1. **Health and Other Related Issues**

Blood Transfusion

Mother to Child transmission

Sharing of Items with infected persons (e.g. tooth brushes, blades)

1. **Other means (please write below)**

**Questionnaire**

**Title of Study: Molecular detection of Hepatitis D virus infection and associated factors among hepatitis B virus patients from selected hospitals in Accra**

1. Have you in anyway been pricked by sharps or syringes used on an infected person? 1. Yes 2. No

12. Has the blood or any other body fluid blood an infected person splashes on you before? 1. Yes 2. No

13. May I know if you inject 1. Yes 2. No

14. Do you have more than one sexual partner? 1. Yes 2. No

15. Have you ever had more than one sexual partner before? 1. Yes 2. No

16. Do you have body tattoos? 1. Yes 2. No

17. Have you ever had blood transfusion? 1. Yes 2. No

18. Have ever shared items like tooth brushes and blades with a person with Hepatitis B before? 1. Yes

2. No 3. do not know

19. If **No** toquestions 11 to 18; kindly state how you got the infection?

………………………………………………………………

20. Do you have any known condition aside the HBV infection? 1. Yes 2. No

21. if Yes, indicate the condition (s)

…………………………………………………………………
